# Supplementary material for: A compressible porous superhydrophobic material constructed by a multi-template high internal phase emulsion method for oil–water separation
Source: Royal Society of Chemistry journal article supplement (doi:10.1039/d3ra03997h), 2023-01-01
Supplement: d3ra03997h1.pdf [file d3ra03997h1.pdf]

## **A compressible porous superhydrophobic material constructed by multi-template high internal phase emulsion method for oil-water separation.**

Zhipeng Wen,<sup>a</sup> Huilin Yang,<sup>a</sup> Mingzhe Lv,<sup>b</sup> Chuanming Yu<sup>\*a</sup> and Yong Li<sup>\*a</sup>

<sup>a.</sup> Faculty of Chemistry and Environmental Science, Guangdong Ocean University, Zhanjiang, 524088, P. R. China. E-mail: wzp15768389775@163.com.

<sup>\*</sup>Corresponding author: Chuanming Yu, E-mail: yucmingdou@163.com; Yong Li, E-mail: yongli6808@126.com.

<sup>b.</sup> Institute of Agricultural Product Processing Research, Chinese Academy of Tropical Agricultural Sciences, Zhanjiang 524001, China.

### **Preparation of oyster shell powders (OSPs)**

Oyster shells were obtained from a local coastal beach of Techeng Island, Zhanjiang. The shells were soaked in an alcohol solution after cleaning with a brush. After that, they were washed with deionized water, air-dried, and pulverized in a grinder, which was followed by cribration with a 1000 mesh sieve to produce the OSP for subsequent experiments.

### **Preparation of oyster shell powders (OSPs@Foam)**

A predetermined amount of 0.1 g DVB and 0.4 g St were sequentially added to a glass sample vial, followed by the addition of 0.1 g Span 80, 0.02 g AIBN, and 0.05 g OSFs. The resulting mixture was sonicated for 5 minutes to ensure uniform mixing. Distilled water was then added in batches to the glass sample vial, with the vial vigorously shaken by hand after adding 1 mL to emulsify the emulsion in the system thoroughly. The resulting high internal phase emulsion was subjected to thermal treatment at 70°C for 8 hours. The glass vial was carefully cracked open, and the material was extracted and dried in an oven at 60°C. The sample was then subjected to Soxhlet extraction using anhydrous ethanol as the extractant to remove unreacted material and impurities.

## The simulation results of oil absorption kinetic models

| Models               | Parameters    | Expressions                                           | Oil or solvents |          |                 |         |         |          |
|----------------------|---------------|-------------------------------------------------------|-----------------|----------|-----------------|---------|---------|----------|
|                      |               |                                                       | Ethanol         | Methanol | Petroleum ether | CTC     | Diesel  | Corn oil |
| First kinetic        | $R^2$         | $\ln(Q_e - Q_t) = \ln Q_e - k_1 t$                    | 0.9015          | 0.9650   | 0.9729          | 0.8921  | 0.8859  | 0.8607   |
|                      | $\ln Q_e$     |                                                       | 3.46            | 3.37     | 3.28            | 4.75    | 3.58    | 3.49     |
|                      | $k_1$         |                                                       | -0.0107         | -0.0196  | -0.0249         | -0.0229 | -0.0051 | -0.0007  |
| Secondary kinetic    | $R^2$         | $\frac{t}{Q_t} = \frac{1}{k_2 Q_e^2} + \frac{t}{Q_e}$ | 0.9785          | 0.9942   | 0.9873          | 0.9942  | 0.9621  | 0.9477   |
|                      | $1/k_2 Q_e^2$ |                                                       | 0.9026          | 0.5668   | 0.4526          | 0.2136  | 2.5920  | 21.0746  |
|                      | $1/Q_e$       |                                                       | 0.0228          | 0.0278   | 0.0236          | 0.0092  | 0.0265  | 0.0314   |
| Elovich kinetic      | $R^2$         | $Q_t = a + blnt$                                      | 0.9428          | 0.9773   | 0.9502          | 0.9664  | 0.9055  | 0.8262   |
|                      | $a$           |                                                       | -2.67           | 0.24     | 0.18            | 2.22    | -6.26   | -6.63    |
|                      | $b$           |                                                       | 6.9073          | 5.9723   | 7.2452          | 17.0173 | 5.6650  | 3.4450   |
| Weber-Morris kinetic | $R^2$         | $Q_t = k_i t^{1/2} + C$                               | 0.9906          | 0.9478   | 0.9656          | 0.9495  | 0.9976  | 0.9934   |
|                      | $C$           |                                                       | 6.26            | 7.25     | 6.87            | 24.48   | 2.81    | 3.03     |
|                      | $k_i$         |                                                       | 1.8679          | 1.8101   | 2.5918          | 4.6772  | 1.2213  | 0.3398   |
